# Expected patterns of local ancestry in a hybrid zone

Joel Smith<sup>1\*</sup>, Bret Payseur<sup>2</sup>, John Novembre<sup>1,3</sup>

**1** Department of Ecology and Evolution, University of Chicago, Chicago, IL

**2** Laboratory of Genetics, University of Wisconsin-Madison, Madison, WI

**3** Department of Human Genetics, University of Chicago, Chicago, IL

\*joelsmith@uchicago.edu

## 1 **1 Abstract**

2 The initial drivers of reproductive isolation between species are poorly characterized. In cases where  
3 partial reproductive isolation exists, genomic patterns of variation in hybrid zones may provide clues  
4 about the barriers to gene flow which arose first during the early stages of speciation. Purifying  
5 selection against incompatible substitutions that reduce hybrid fitness has the potential to distort  
6 local patterns of ancestry relative to background patterns across the genome. The magnitude and  
7 qualitative properties of this pattern are dependent on several factors including migration history and  
8 the relative fitnesses for different combinations of incompatible alleles. We present a model which  
9 may account for these factors and highlight the potential for its use in verifying the action of natural  
10 selection on candidate loci implicated in reducing hybrid fitness.

## 11 **2 Introduction**

12 A large fraction of research aiming to describe the process of speciation involves mapping genetic  
13 variants responsible for reproductive isolation. Despite its difficulty, this task has nevertheless been  
14 carried out for a number of cases in which the link between a reproductive isolating mechanism mapped  
15 in a laboratory setting and its effect on an individual's fitness in nature is demonstrated [Schluter,  
16 2009]. However, in many of these cases, reproductive isolation is already complete such that the initial  
17 cause of speciation cannot be attributed to any one locus or set of loci due to a lack of information  
18 regarding the order in which these isolating barriers arose [Turelli et al., 2014]. Hybrid zones present  
19 a convenient situation where reproductive isolation is incomplete. In these cases, the mechanisms of  
20 reproductive isolation are both fewer and more recently derived. Relative to scenarios with complete  
21 reproductive isolation, systems with ongoing hybridization may provide a more narrow set of candidate  
22 loci to consider as the initial drivers of speciation.

23 The next task would be to describe the mechanism by which the incompatible substitutions were  
24 fixed. Functional annotations for the implicated loci can yield some clues about the ecological context  
25 or genetic causes that resulted in these substitutions. A rigorously tested explanation would require  
26 that field experiments be carried out to establish their effect on fitness in nature [Schemske, 2000,  
27 Schemske and Bradshaw, 1999]. However, patterns of genomic variation can provide a complementary  
28 source of evidence for the action of natural selection on genetic variants which are relevant to a  
29 phenotype of interest [Tiffin and Ross-Ibarra, 2014]. The robustness of any given metric or model for  
30 the signature of natural selection depends on well-conceived theory that describes both the conditions  
31 under which the signature is detectable as well as any non-selective processes that can explain the  
32 pattern. This observational approach has been a driver of both theoretical and empirical research which  
33 aims to implicate loci responsible for genetic incompatibilities that decrease fitness among hybrids in  
34 nature [Barton, 1979, Barton and Hewitt, 1985, Endler, 1973, White, 1968].

35 Hybrid zones are thought to present a useful situation where the interaction between gene flow and  
36 natural selection can leave identifiable patterns associated with genetic incompatibilities in genomic  
37 data [Harrison and Larson, 2016, Payseur, 2010, Payseur and Rieseberg, 2016]. Historically, most  
38 work on this problem has relied on using differences in allele frequencies across the hybrid zone while  
39 ignoring patterns of linkage disequilibrium among neighboring sites [Barton and Hewitt, 1985]. More  
40 recently, increased access to sequencing technology has prompted the use of methods which can infer  
41 local ancestry across the genomes of admixed individuals [Gompert and Buerkle, 2013]. In this regard,  
42 population genetic inference has made a significant shift toward developing models which leverage this  
43 information for a variety of purposes. Several models aim to infer the migration history between  
44 genetically distinct populations using the length of ancestry tract lengths among admixed individuals  
45 [Gravel, 2012, Harris and Nielsen, 2013, Hellenthal et al., 2014, Liang and Nielsen, 2014, Loh et al.,  
46 2013, Patterson et al., 2012, Pool and Nielsen, 2009, Price et al., 2009, Sedghifar et al., 2015]. As  
47 the primary intention of these approaches has been to focus on populations within a species, there  
48 is a lack of work which aims to describe the effect of genetic incompatibilities which commonly arise  
49 between species after a prolonged period of geographic isolation.

50 Theory with formal treatment of genetic incompatibilities and ancestry tracts has been slow to  
51 accumulate, in large part due to the large parameter space of both migration histories and genetic  
52 architectures that may contribute to reduced fitness in hybrid individuals. As a result, forward sim-  
53 ulations of whole chromosomes under differing migration and selection regimes have been used to  
54 describe some general patterns [Gompert et al., 2012, Hvala et al., 2018, Lindtke and Buerkle, 2015,  
55 Schumer and Brandvain, 2016]. In a few of these cases, the primary goal is to describe the conditions

56 which may account for the heterogeneous patterns of genomic differentiation which have been widely  
57 observed across hybrid zones [Harrison and Larson, 2016]. For example, Gompert et al. [2012] focus  
58 on describing differences in both the number of contributing loci and the mechanism of their effect  
59 through either underdominance at single loci or two-locus epistasis. They also introduce a formalized  
60 approach to identify outlier loci responsible for reduced hybrid fitness using allele frequency clines  
61 across the genome. Lindtke and Buerkle [2015] pay particular attention to two-locus models of genetic  
62 incompatibilities and compare the relative efficiency with which different kinds of epistatic interactions  
63 can maintain genomic differentiation in a hybrid zone under both high and low migration.

64 In an effort to make use of ancestry tract lengths rather than allele frequencies at individual loci,  
65 Sedghifar et al. [2015] derive a null expectation for the length of ancestry tracts in a geographic  
66 context where distance from the contact zone of two genetically distinct populations is explicitly  
67 modeled. They then provide a likelihood function which they use to infer the age of the contact  
68 zone, or time at which admixture between the populations began. Sedghifar et al. [2016] extends this  
69 spatially-explicit framework further to model the mean ancestry tract length which is contiguous with  
70 an under-dominant locus.

71 Another approach that uses local ancestry inference to identify genetic incompatibilities relies on  
72 computing correlations in ancestry among pairs of loci in a hybrid zone [Schumer et al., 2014]. Schumer  
73 and Brandvain [2016] use simulation to demonstrate how selection against incompatible alleles at two  
74 loci can lead to a positive correlation in species ancestry at those loci. They find good power to  
75 identify these associations for genetic architectures that feature ubiquitous selection (see Figure 1d).  
76 The intuition for this pattern is that genotypes with the same ancestry at both loci are the only  
77 genotypes with high fitness, such that an over-representation of ancestry at those loci relative to  
78 background levels of linkage disequilibrium (LD) should lead to an identifiable signal. For genetic  
79 architectures that only feature strong selection against derived allele combinations, they find much  
80 less power to identify significant pairs.

81 The variety of approaches and data available to study this problem have prompted a few questions  
82 of where to proceed next. We first describe a few of the well-studied genetic architectures for two-locus  
83 genetic incompatibilities as well as others that have received less attention but which have also been  
84 identified in nature. We then present a model to compute the expected distribution of ancestry tract  
85 lengths around incompatibility loci.

## 86 2.1 Two-Locus Genetic Incompatibilities

87 The two-locus fitness matrix provides a useful representation of different genetic architectures which  
 88 might contribute to genetic incompatibility between species (Figure 1 and Table 1). In addition to  
 89 theoretical arguments and simulations, much of our current understanding for how relevant any of  
 90 these genetic architectures might be in nature has been driven by genetic dissection of reproductive  
 91 barrier phenotypes in the lab [White et al., 2011]. There are a number of empirical examples in  
 92 a variety of species which have hinted at the potential importance of meiotic drive and neutral (or  
 93 nearly neutral) causes for the fixation of incompatible substitutions [Maheshwari and Barbash, 2011,  
 94 Presgraves, 2010, Sweigart and Willis, 2012]. While the precise combination of evolutionary forces  
 95 which are responsible for incompatibility formation remain unknown, the evolution of incompatibili-  
 96 ties in hybrid populations can be reasonably approximated with simple epistasis [Schumer et al., 2014].

97

|           |                                | <b>bb</b> ( $\mathbf{B}_1\mathbf{B}_1$ ) | <b>Bb</b> ( $\mathbf{B}_1\mathbf{B}_2$ ) | <b>BB</b> ( $\mathbf{B}_2\mathbf{B}_2$ ) |
|-----------|--------------------------------|------------------------------------------|------------------------------------------|------------------------------------------|
| <b>aa</b> | ( $\mathbf{A}_1\mathbf{A}_1$ ) | 1                                        | $1 - s_a h_a$                            | $1 - s_a$                                |
| <b>Aa</b> | ( $\mathbf{A}_1\mathbf{A}_2$ ) | $1 - s_e h_1$                            | $1 - s_e h_0$                            | $1 - s_a h_a$                            |
| <b>AA</b> | ( $\mathbf{A}_2\mathbf{A}_2$ ) | $1 - s_e$                                | $1 - s_e h_1$                            | 1                                        |

**Table 1.** Genotype fitnesses for the DMI and symmetric incompatibility models. The first pairs of bold letters are DMI model genotypes and the genotypes in parentheses indicate the symmetric model.  $s_a$  and  $s_e$  denote the selection coefficient against the ancestral and incompatible alleles, respectively.  $h_a$ ,  $h_0$  and  $h_1$  denote the dominance effects of ancestral, double-heterozygotes and single-heterozygotes, respectively.

98 The most well-known model is described in Dobzhansky [1937] in which alleles fix at two interacting  
 99 loci among populations that are geographically isolated. The top row in Figure 1 shows a range of  
 100 possible fitness matrices that might result from this scenario, also known as the Dobzhansky-Muller  
 101 incompatibility model (DMI). If we denote the ancestral genotype as **aaBB** in all of these cases,  
 102 then the derived genotypes before coming into secondary contact are **aabb** and **AABB**. We chose  
 103 these example matrices to emphasize the diversity of fitness configurations that might result from this  
 104 model. The fitness matrix in Figure 1a is an example where the the derived substitutions were fixed  
 105 by positive selection, such that the ancestral genotype suffers a fitness cost. Figures 1a and 1b are  
 106 examples where the derived alleles interact dominantly; whereas in Figure 1c, derived alleles interact  
 107 recessively.

108 Lindtke and Buerkle [2015] draw attention to a different model of genetic incompatibility where  
 109 allele substitutions occur at two loci in both populations leading to a symmetric pattern of fitnesses

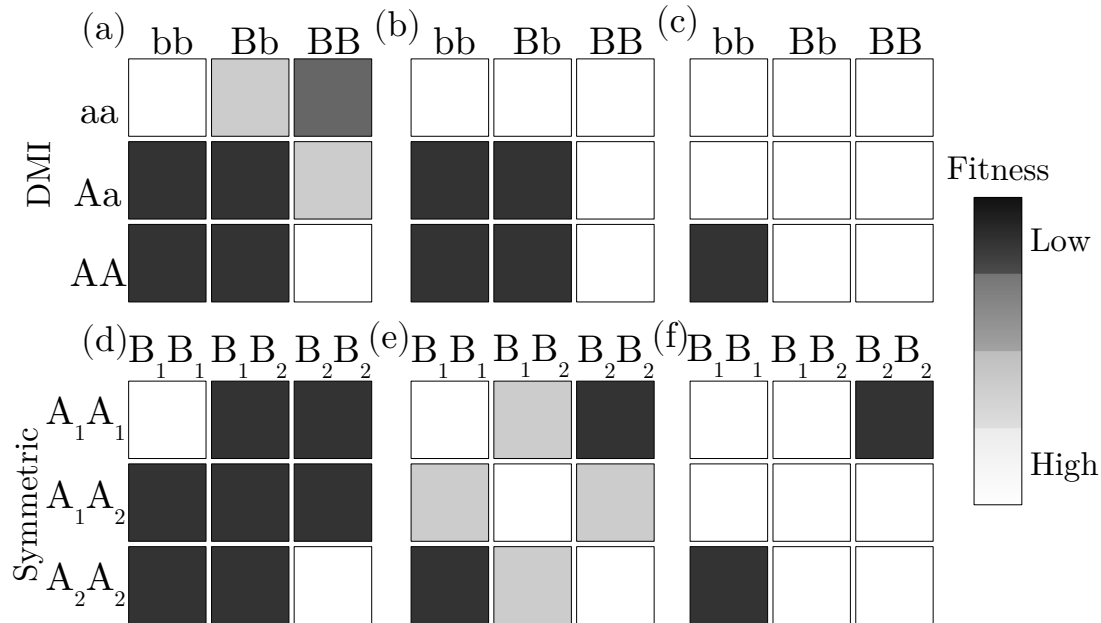

**Fig 1.** Two-locus fitness matrices for six models of genetic incompatibility. Each matrix includes the fitnesses of all possible two-locus genotypes where each locus is biallelic. Shaded boxes represent genotypes with a fitness cost that varies positively with the amount of shading. The top row of matrices are variations of the DMI model with the **aaBB** genotype representing the ancestral state and the bottom row shows variations of a symmetric incompatibility model. For both rows, the dominance effect of derived substitutions decreases from left to right.

110 between the two derived genotypes **A<sub>1</sub>A<sub>1</sub>B<sub>1</sub>B<sub>1</sub>** and **A<sub>2</sub>A<sub>2</sub>B<sub>2</sub>B<sub>2</sub>** (Figure 1d, 1e, 1f). Their results  
 111 suggest that this mechanism could provide a better explanation for the observed patterns of genetic  
 112 differentiation that occur at extended genomic distances between species that hybridize [Harrison  
 113 and Larson, 2016]. Regulatory interactions between a transcription factor encoded at one locus and  
 114 the corresponding binding site at a second locus would be one scenario consistent with this model.  
 115 Seehausen et al. [2014] note that this model could also be common in meiotic drive scenarios where a  
 116 substitution that promotes biased transmission of a selfish genetic element at one locus is counteracted  
 117 by a substitution at a second locus which restores unbiased inheritance. The bottom row in Figure 1  
 118 shows a range of possible fitness matrices under this model, where the left-most matrix results from  
 119 dominant substitutions which interfere between haplotypes, and the right most matrix results from  
 120 recessive substitutions. Simulated data in Figure 2 (using the software dfuse from Lindtke and Buerkle  
 121 [2015]) illustrates the effect of the DMI model in Figure 1b where selection against derived alleles leads

122 to a bias towards the ancestral genotype (**aaBB**) of recombined ancestries.

123 In the following section, we first review an approach taken by Gravel [2012] to model the distri-  
124 bution of ancestry tract lengths across the genomes of an admixed population. We then describe the  
125 framework for our own extension to this approach which aims to model the distribution of ancestry  
126 tract lengths that are contiguous with a locus undergoing epistatic interactions according to any of  
127 the incompatibility scenarios outlined above.

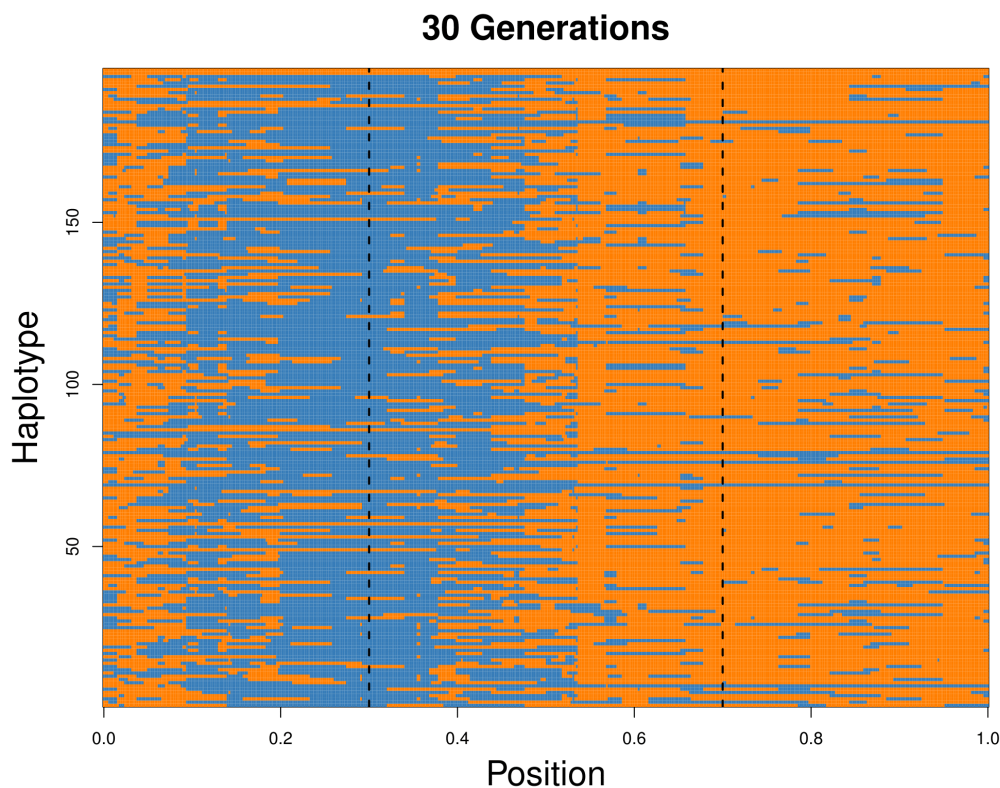

**Fig 2.** Haplotype data simulated using the software *dfuse* with the fitness matrix in Figure 1b. The forward-in-time simulation begins with two infinite source populations contributing equal fractions of ancestry (0.5) to a target population of 100 individuals 30 generations in the past. Each generation to the present follows a Wright-Fisher model, whereby both source populations contribute a fraction of individuals  $m$  to the target population. In this case  $m = 0.1$ . Recombination occurs uniformly along the chromosome at rate 1 crossover per chromosome per generation. After recombination, individuals are removed from the population according to a specified fitness matrix. The parameter values defined in Table 1 take the following values:  $s_a = 0$ ,  $s_e = 0.9$ ,  $h_1 = 1$ ,  $h_0 = 1$ , and  $h_a = 0$ . The incompatibility loci are indicated by the vertical dotted lines.

## 128 3 Model Description

### 129 3.1 Tract Length Distributions Under Neutral Admixture

130 Gravel [2012] defines a Markov chain along a chromosome with transition rates between both an ances-  
 131 try state variable,  $p$ , and the time,  $t$ , at which ancestry  $p$  arrives in a hybrid population. Consider the  
 132 demography of a sample up to the first hybridization event  $T$  generations ago, where each generation  
 133 is labeled  $s \in \{0, 1, 2, \dots, T - 1\}$ . Let  $m_p(t)$  denote the fraction of individuals in the target population  
 134 replaced by individuals from source population  $p$  at time  $t$ .  $m(t)$  is the total fraction of individuals  
 135 in the target population replaced by migrants in generation  $t$  where  $\sum_p m_p(t) \leq 1$ . Moving along a  
 136 chromosome from any point, the probability of encountering state  $(p, t)$  after a recombination event  
 137 that occurred at generation  $\tau$  is

$$P(p, t | \tau) = m_p(t) \prod_{t'=\tau+1}^{t-1} (1 - m(t')). \quad (1)$$

138  $\tau$  is uniformly distributed on  $(1, t - 1)$ , so the discrete transition probabilities can be expressed as

$$R(p, t \rightarrow p', t') = \sum_{\tau=1}^{\min(t, t')-1} \frac{P(p', t' | \tau)}{(t - 1)} \quad (2)$$

139 To get the continuous transition rate, one can multiply the discrete transition rate by the continuous  
 140 overall transition rate  $t - 1$ . This follows from the fact that a recombination event occurs at each gen-  
 141 eration such that probability of observing an ancestry junction depends on the number of generations  
 142 since admixture:

$$Q(p, t \rightarrow p', t') = m_{p'}(t') \sum_{\tau=1}^{\min(t, t')-1} \prod_{s=\tau+1}^{t'-1} (1 - m(s)). \quad (3)$$

143 Using  $Q$ , one can compute the tract length distribution for a given ancestry.  $Q$  is first uniformized  
 144 to adjust self-transition probabilities such that the total transition rate from each state is equal to  
 145 the rate of the state with the highest transition rate,  $Q_0$  [Stewart, 1994]. One can then compute the  
 146 distribution of the number of steps spent in a particular ancestry,  $\{b_n\}_{n=1, \dots, \Lambda}$ , up to a cutoff  $\Lambda$ , where  
 147  $\sum_{i=1}^{\Lambda} b_i \approx 1$ .  $\{b_n\}_{n=1, \dots, \Lambda}$  is computed by multiplying the state vector with the transition matrix for  
 148  $\Lambda$  iterations while recording the amount of probability absorbed by the non- $p$  ancestries at each step.  
 149 The Erlang distribution models the length of a trajectory,  $l$ , with  $k$  steps as:

$$\mathbb{E}_{k, Q_0}(l) = \frac{Q_0^k l^{k-1} e^{-Q_0 l}}{(k-1)!} \quad (4)$$

150 This leads to the tract length distribution:

$$\phi(l) = \sum_{k=1}^{\Lambda+1} b_k \mathbb{E}_{k, Q_0}(l) \quad (5)$$

### 151 **3.2 A Locus-Specific Tract Length Distribution With Selection**

152 Equation 5 describes the length of tracts in a way that is not locus specific. We are interested in how  
153 the effects of purifying selection against alleles at two loci under negative selection, according to the  
154 incompatibility models described above, may skew the tract length distribution. More specifically, we  
155 want to model the distribution of ancestry tracts lengths that are contiguous with a negatively selected  
156 allele on a chromosome. In this case, the probability of observing a transition, or recombination event,  
157 depends on its recombination distance from the incompatibility loci of interest.

158 We define the number of basepairs between loci A and B to be  $v + w = L$ , where  $v$  is the number  
159 of basepairs from the A locus to the  $v$ th position and  $w$  is the number of basepairs from position  $v + 1$   
160 to  $L$  (Figure 3). We extend the transition matrix  $Q$  in equation (3) such that each value of  $v$  denotes  
161 a new  $Q_v$  by multiplying each transition rate by the probability,  $\Psi_v^\tau$ , that an ancestry junction which  
162 arises at time  $\tau$  at position  $v$  survives to the present:

$$Q_v(p, t \rightarrow p', t') = m_{p'}(t') \sum_{\tau=1}^{\min(t, t')-1} \Psi_v^\tau \prod_{s=\tau+1}^{t'-1} (1 - m(s)). \quad (6)$$

163 Equation 6 is computed as a function of the sequence of genotypic backgrounds the junction encounters  
164 each generation to the present. Using a two-allele model, let **A** and **a** refer to alternative alleles at the  
165 locus of interest, and alleles **B** and **b** refer to the second locus located at some distance away from the  
166 **A** locus. We can define a state space,  $S$ , of two-locus genotypes in which the junction can exist:



$$S = \begin{bmatrix} \mathbf{AB}|ab \\ \mathbf{AB}|Ab \\ \mathbf{AB}|aB \\ \mathbf{AB}|AB \\ \mathbf{Ab}|ab \\ \mathbf{Ab}|Ab \\ \mathbf{Ab}|aB \\ \mathbf{Ab}|AB \\ \mathbf{aB}|ab \\ \mathbf{aB}|Ab \\ \mathbf{aB}|aB \\ \mathbf{aB}|AB \\ \mathbf{ab}|ab \\ \mathbf{ab}|Ab \\ \mathbf{ab}|aB \\ \mathbf{ab}|AB \\ \epsilon \end{bmatrix}$$

167 where the bold pair of alleles refers to the chromosome on which the junction resides. In cases where  
 168 the interacting loci are on different chromosomes, the bold alleles refer to the genomic complement  
 169 from which the junction is inherited.

170 Let  $\mathbf{P}_v^{t,t-1}$  be a symmetric  $17 \times 17$  transition matrix among the states in  $S$  from time  $t$  to  $t-1$  for a  
 171 junction at the  $v$ th position, where  $\mathbf{P}_{v,i,j}^{t,t-1}$  refers to the transition from state  $i$  to  $j$ . The first row in this  
 172 matrix is shown below in Equation 7 (see Appendix A for rows 1-17). The transition probabilities in  
 173  $\mathbf{P}_v^{t,t-1}$  depend on the fitness of genotypes carrying the junction,  $\omega$ , the recombination rate between the  
 174 interacting loci,  $r$ , and the frequency of possible gametes with which to pair in the hybrid population  
 175 at time  $t-1$ :  $x_1^{t-1}, x_2^{t-1}, x_3^{t-1}, x_4^{t-1}$ . Let  $x_1, x_2, x_3, x_4$  refer to the frequencies of gametes  $\mathbf{AB}, \mathbf{Ab},$   
 176  $\mathbf{aB}$  and  $\mathbf{ab}$ , respectively. Gamete frequencies are computed numerically by simulation [Gavrilets 1997,  
 177 Appendix A.5]. Let  $\omega_i$  denote the marginal fitness of gamete  $i$  where  $\omega_1, \omega_2, \omega_3, \omega_4$  refer to gametes  
 178  $\mathbf{AB}, \mathbf{Ab}, \mathbf{aB}$  and  $\mathbf{ab}$ , respectively. Let  $\omega_{ij}$  refer to the fitness of an individual with gametes  $i$  and  $j$ .  
 179 Figure 3 provides some intuition for how the following transition probabilities in  $\mathbf{P}_v^{t,t-1}$  are computed.

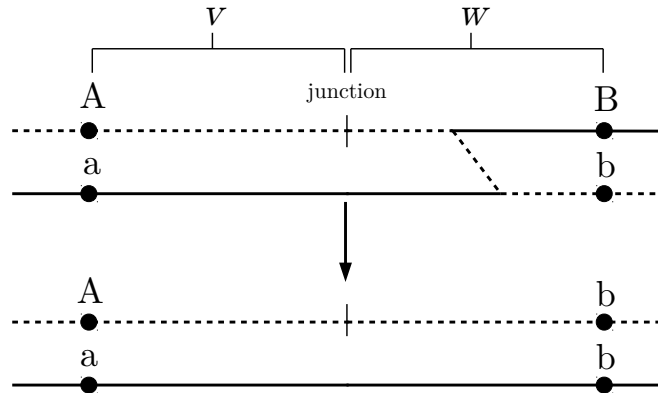

**Fig 3.** A visual description of the transition probability  $\mathbf{P}_{v,1,5}^{t,t-1}$ . For the first state in  $S$ ,  $\mathbf{AB}|ab$ , the transition probability to state  $\mathbf{Ab}|ab$ , is a product of the probability that the bold haplotype ( $\mathbf{AB}$ ) is chosen (0.5), a recombination event occurs between the junction and locus B,  $r\frac{w}{v+w}$ , the recombined gamete gets paired with gamete  $x_4$  at time  $t - 1$ , and the individual with genotype  $\mathbf{Ab}|ab$  survives,  $\omega_{14}$ .

$$\mathbf{P}_{v,1,j}^{t,t-1} = \begin{cases} .5\omega_{14}(1-r)x_4^{t-1} & \text{if } j = 1; \\ .5\omega_{14}(1-r)x_2^{t-1} & \text{if } j = 2; \\ .5\omega_{14}(1-r)x_3^{t-1} & \text{if } j = 3; \\ .5\omega_{14}(1-r)x_1^{t-1} & \text{if } j = 4; \\ .5\omega_{14}r\frac{w}{v+w}x_4^{t-1} & \text{if } j = 5; \\ .5\omega_{14}r\frac{w}{v+w}x_2^{t-1} & \text{if } j = 6; \\ .5\omega_{14}r\frac{w}{v+w}x_3^{t-1} & \text{if } j = 7; \\ .5\omega_{14}r\frac{w}{v+w}x_1^{t-1} & \text{if } j = 8; \\ .5\omega_{14}r\frac{v}{v+w}x_4^{t-1} & \text{if } j = 9; \\ .5\omega_{14}r\frac{v}{v+w}x_2^{t-1} & \text{if } j = 10; \\ .5\omega_{14}r\frac{v}{v+w}x_3^{t-1} & \text{if } j = 11; \\ .5\omega_{14}r\frac{v}{v+w}x_1^{t-1} & \text{if } j = 12; \\ 0 & \text{if } j = 13; \\ 0 & \text{if } j = 14; \\ 0 & \text{if } j = 15; \\ 0 & \text{if } j = 16; \\ 1 - \sum_j^{16} \mathbf{P}_{1,j}^{t,t-1} & \text{if } j = 17 \end{cases} \quad (7)$$

183 We can define the initial probabilities,  $\pi_0^\tau$ , of a junction in each state when it occurs at a partic-  
 184 ular time  $\tau$ . These probabilities will vary depending on the ancestry of interest for the tract length  
 185 distribution. Conditional on a recombination event occurring between the two loci, the probability  
 186 that the junction occurs at any particular position is uniform ( $1/L$ ). If the ancestry of interest is that  
 187 of the A allele, then

$$\pi_0^\tau = \begin{bmatrix} 2p_A^\tau p_B^\tau x_1^\tau \\ 2p_A^\tau p_B^\tau x_2^\tau \\ 2p_A^\tau p_B^\tau x_3^\tau \\ 2p_A^\tau p_B^\tau x_4^\tau \\ 2p_A^\tau p_b^\tau x_1^\tau \\ 2p_A^\tau p_b^\tau x_2^\tau \\ 2p_A^\tau p_b^\tau x_3^\tau \\ 2p_A^\tau p_b^\tau x_4^\tau \\ 0 \\ 0 \\ 0 \\ 0 \\ 0 \\ 0 \\ 0 \\ 0 \\ 0 \end{bmatrix}$$

188 where  $p_A^\tau, p_a^\tau, p_B^\tau, p_b^\tau$  are the allele frequencies at time  $\tau$ . The probability that the junction resides  
 189 among each of the states after its origination at time  $\tau$  to the present is

$$\pi_v^\tau = \pi_0^\tau \prod_{t=0}^{\tau} \mathbf{P}_v^{t,t-1}. \quad (8)$$

190 After defining the vector  $\eta = [0, 0, 0, 0, 0, 0, 0, 0, 0, 0, 0, 0, 0, 0, 0, 1]$ , the survival probability of the  
 191 junction is

$$\Psi_v^\tau = 1 - \pi_v^\tau \eta. \quad (9)$$

192 The transition matrix  $Q_v$  can now be computed using Equation 6 for all values of  $v$  where  $v \in$   
 193  $\{1 \dots L\}$ . In contrast to the transition matrix  $Q$  defined in Equation 3, the set of transition matrices

194  $Q_v$  are inhomogeneous over positions  $v$ . As a result, the uniformization technique outlined in Stewart  
195 [1994] does not apply. However, Andreychenko [2010] describes an approach to uniformize a time-  
196 inhomogeneous Markov chain which relies on partitioning the transition matrix into time-dependent  
197 and time-independent components. Whereas the time-homogeneous case relies on uniformizing by the  
198 constant transition rate of the state with the largest value, the time-inhomogeneous case relies on using  
199 the average rate of the state with the largest transition rate value. As before, the distribution for the  
200 number of steps in a trajectory,  $\{b_n\}_{n=1,\dots,\Lambda}$ , can be computed and used with Equations 4 and 5 to  
201 calculate the tract length distribution.

## 202 4 Discussion

203 The model presented above describes an approach which may prove useful in verifying the role of  
204 purifying selection against incompatible alleles in a hybrid zone. If shown to be robust under a  
205 reasonable set of demographic scenarios and genetic architectures for incompatibility, this model would  
206 provide an additional tool for testing the effects of selection on candidate loci which have been identified  
207 by QTL mapping of hybrid sterility or inviability traits [White et al., 2011]. This model could also be  
208 used to develop an independent test of loci identified by steep clines in allele frequency across a hybrid  
209 zone relative to the genomic background [Gompert et al., 2012]. We would like to emphasize the  
210 novelty and potential power of considering a genetic architecture of reproductive isolation for which  
211 there is strong empirical support (The Dobzhansky-Muller model) in the context of ancestry.

212 While any formal statements regarding the expected tract length distribution would require a  
213 full implementation of this model, we can make a few intuitive statements which follow from previous  
214 theory and simulation [Hvala et al., 2018, Lindtke and Buerkle, 2015]. In particular, Hvala et al. [2018]  
215 show that the number and density of ancestry junctions scales negatively with selection strength at  
216 incompatibility loci. This signature was further influenced by the genetic distance of junctions from  
217 the loci, the form of selection and dominance.

218 There are several challenges that remain before computing expected tract length distributions  
219 and performing inference on parameters of interest. In particular, computing  $Q_v$  for a large set of  
220 positions may be difficult considering the repeated summation over products in Equation 6, the matrix  
221 multiplication required both for Equation 8, and computing  $\{b_n\}_{n=1,\dots,\Lambda}$ . While Gravel [2012] intended  
222 to model admixture events which occurred relatively recently, many hybrid zones of interest are likely  
223 to have formed more than 100 generations ago, which produces more computational burden given that  
224 the state space of  $Q_v$  is  $2Tv$ . However, it is likely that differences in the junction survival probability,

225  $\Psi_v^\tau$ , beyond some value of  $\tau$  become negligible. The simplified two-locus, two-allele model that we  
226 consider is another effort to reduce the parameter space of genotype fitnesses that might result from  
227 higher-order epistasis of 3 or more loci.

228 Because  $\Psi_v^\tau$  is dependent on hybrid zone gamete frequencies in a linear stepping-stone model,  
229 deviation from this simplifying assumption will most likely affect the results. The linear stepping-stone  
230 model which we borrow from Gavrilets [1997] can be generalized to any number of demes between the  
231 two infinite source populations. By implementing our model with this population structure, one could  
232 compute tract length distributions as a function of distance from the hybrid zone in a similar spirit  
233 to the more geography-explicit approach of Sedghifar et al. [2015, 2016]. The assumption of large  
234 population size is another assumption which could also be relaxed (see Appendix 1 in Gravel [2012]),  
235 as this will likely influence the rate at which ancestry junctions are fixed or lost from the population.

236 Aside from the challenges of model misspecification, performing inference will be particularly  
237 difficult considering the computational burden of computing the tract length distribution for a set  
238 of migration rates and fitness matrix parameters. Gravel [2012] uses a maximum-likelihood scheme to  
239 identify the set of parameters that best describe the magnitude and timing of migration events from  
240 a source into a target population. Given that our primary interest is to infer the effects of purifying  
241 selection, it may be more efficient to treat the migration history as a latent variable to be marginalized  
242 over using Markov chain Monte Carlo.

243 Despite these challenges, our framework for computing statistical properties of haplotypes in a  
244 hybrid zone represents one of only a few recent efforts which aim to exploit the combination of whole-  
245 genome sequencing and dense genotyping approaches that have emerged for non-model systems. In  
246 particular, this model is the only example that we know of for deriving locus-specific haplotype patterns  
247 under epistasis. Given the complexity of this problem, an alternative option may be to use simulation-  
248 based classification in a machine learning framework [Chan et al., 2018, Schrider and Kern, 2018,  
249 Sheehan and Song, 2016]. Rather than focusing on any one summary statistic, several summary  
250 statistics with potential relevance to purifying selection against genetic incompatibilities could be  
251 used simultaneously. Alternatively, Chan et al. [2018] describe another machine learning approach  
252 which could instead use genotype data directly.

253 Regardless of the methods used to identify genomic patterns of purifying selection against incom-  
254 patibility loci, this effort represents one facet of the many lines of evidence necessary to identify and  
255 describe the causes of reproductive isolation between species.

## 256 Acknowledgements

257 We thank Megan Frayer and John Hvala at The University of Wisconsin, Madison for their helpful  
 258 discussions and insight. We also thank Yaniv Brandvain for additional advice and encouragement.  
 259 Members of the Novembre, Stephens, and He labs provided useful feedback at an early stage. This  
 260 work was funded by NSF grant DEB-1353737 to Bret Payseur, DEB-1353737 to Bret Payseur and John  
 261 Novembre as well as NSF Graduate Research Fellowship and National Institute Of General Medical  
 262 Sciences of the National Institutes of Health under award numbers DGE-1144082 and T32GM007197  
 263 to Joel Smith.

## 264 Appendix A

265 The full transition matrix used to compute the junction survival probabilities in Equation 9:

$$\mathbf{P}_{v,1,j}^{t,t-1} = \begin{cases} .5\omega_{14}(1-r)x_4^{t-1} & \text{if } j = 1; \\ .5\omega_{14}(1-r)x_2^{t-1} & \text{if } j = 2; \\ .5\omega_{14}(1-r)x_3^{t-1} & \text{if } j = 3; \\ .5\omega_{14}(1-r)x_1^{t-1} & \text{if } j = 4; \\ .5\omega_{14}r\frac{w}{v+w}x_4^{t-1} & \text{if } j = 5; \\ .5\omega_{14}r\frac{w}{v+w}x_2^{t-1} & \text{if } j = 6; \\ .5\omega_{14}r\frac{w}{v+w}x_3^{t-1} & \text{if } j = 7; \\ .5\omega_{14}r\frac{w}{v+w}x_1^{t-1} & \text{if } j = 8 \\ .5\omega_{14}r\frac{v}{v+w}x_4^{t-1} & \text{if } j = 9; \\ .5\omega_{14}r\frac{v}{v+w}x_2^{t-1} & \text{if } j = 10; \\ .5\omega_{14}r\frac{v}{v+w}x_3^{t-1} & \text{if } j = 11; \\ .5\omega_{14}r\frac{v}{v+w}x_1^{t-1} & \text{if } j = 12 \\ 0 & \text{if } j = 13; \\ 0 & \text{if } j = 14; \\ 0 & \text{if } j = 15; \\ 0 & \text{if } j = 16 \\ 1 - \sum_j^{16} \mathbf{P}_{1,j}^{t,t-1} & \text{if } j = 17 \end{cases} \quad (10)$$

$$\mathbf{P}_{v,2,j}^{t,t-1} = \begin{cases} .5\omega_{12}(((1-r)x_4^{t-1}) + (r\frac{v}{v+w}x_4^{t-1})) & \text{if } j = 1; \\ .5\omega_{12}(((1-r)x_2^{t-1}) + (r\frac{v}{v+w}x_2^{t-1})) & \text{if } j = 2; \\ .5\omega_{12}(((1-r)x_3^{t-1}) + (r\frac{v}{v+w}x_3^{t-1})) & \text{if } j = 3; \\ .5\omega_{12}(((1-r)x_1^{t-1}) + (r\frac{v}{v+w}x_1^{t-1})) & \text{if } j = 4; \\ .5\omega_{12}r\frac{w}{v+w}x_4^{t-1} & \text{if } j = 5; \\ .5\omega_{12}r\frac{w}{v+w}x_2^{t-1} & \text{if } j = 6; \\ .5\omega_{12}r\frac{w}{v+w}x_3^{t-1} & \text{if } j = 7; \\ .5\omega_{12}r\frac{w}{v+w}x_1^{t-1} & \text{if } j = 8 \\ 0 & \text{if } j = 9; \\ 0 & \text{if } j = 10; \\ 0 & \text{if } j = 11; \\ 0 & \text{if } j = 12 \\ 0 & \text{if } j = 13; \\ 0 & \text{if } j = 14; \\ 0 & \text{if } j = 15; \\ 0 & \text{if } j = 16 \\ 1 - \sum_j^{16} \mathbf{P}_{2,j}^{t,t-1} & \text{if } j = 17 \end{cases} \quad (11)$$

$$\mathbf{P}_{v,3,j}^{t,t-1} = \begin{cases} .5\omega_{13}(((1-r)x_4^{t-1}) + (r\frac{w}{v+w}x_4^{t-1})) & \text{if } j = 1; \\ .5\omega_{13}(((1-r)x_2^{t-1}) + (r\frac{w}{v+w}x_2^{t-1})) & \text{if } j = 2; \\ .5\omega_{13}(((1-r)x_3^{t-1}) + (r\frac{w}{v+w}x_3^{t-1})) & \text{if } j = 3; \\ .5\omega_{13}(((1-r)x_1^{t-1}) + (r\frac{w}{v+w}x_1^{t-1})) & \text{if } j = 4; \\ 0 & \text{if } j = 5; \\ 0 & \text{if } j = 6; \\ 0 & \text{if } j = 7; \\ 0 & \text{if } j = 8; \\ .5\omega_{13}r\frac{v}{v+w}x_4^{t-1} & \text{if } j = 9; \\ .5\omega_{13}r\frac{v}{v+w}x_2^{t-1} & \text{if } j = 10; \\ .5\omega_{13}r\frac{v}{v+w}x_3^{t-1} & \text{if } j = 11; \\ .5\omega_{13}r\frac{v}{v+w}x_1^{t-1} & \text{if } j = 12 \\ 0 & \text{if } j = 13; \\ 0 & \text{if } j = 14; \\ 0 & \text{if } j = 15; \\ 0 & \text{if } j = 16 \\ 1 - \sum_j^{16} \mathbf{P}_{3,j}^{t,t-1} & \text{if } j = 17 \end{cases} \quad (12)$$

$$\mathbf{P}_{v,4,j}^{t,t-1} = \begin{cases} .5\omega_{11}(((1-r)x_4^{t-1}) + (rx_4^{t-1})) & \text{if } j = 1; \\ .5\omega_{11}(((1-r)x_2^{t-1}) + (rx_2^{t-1})) & \text{if } j = 2; \\ .5\omega_{11}(((1-r)x_3^{t-1}) + (rx_3^{t-1})) & \text{if } j = 3; \\ .5\omega_{11}(((1-r)x_1^{t-1}) + (rx_1^{t-1})) & \text{if } j = 4; \\ 0 & \text{if } j = 5; \\ 0 & \text{if } j = 6; \\ 0 & \text{if } j = 7; \\ 0 & \text{if } j = 8; \\ 0 & \text{if } j = 9; \\ 0 & \text{if } j = 10; \\ 0 & \text{if } j = 11; \\ 0 & \text{if } j = 12; \\ 0 & \text{if } j = 13; \\ 0 & \text{if } j = 14; \\ 0 & \text{if } j = 15; \\ 0 & \text{if } j = 16 \\ 1 - \sum_j^{16} \mathbf{P}_{4,j}^{t,t-1} & \text{if } j = 17 \end{cases} \quad (13)$$

$$\mathbf{P}_{v,5,j}^{t,t-1} = \begin{cases} 0 & \text{if } j = 1; \\ 0 & \text{if } j = 2; \\ 0 & \text{if } j = 3; \\ 0 & \text{if } j = 4; \\ .5\omega_{24}(((1-r)x_4^{t-1}) + (r\frac{w}{v+w}x_4^{t-1})) & \text{if } j = 5; \\ .5\omega_{24}(((1-r)x_2^{t-1}) + (r\frac{w}{v+w}x_2^{t-1})) & \text{if } j = 6; \\ .5\omega_{24}(((1-r)x_3^{t-1}) + (r\frac{w}{v+w}x_3^{t-1})) & \text{if } j = 7; \\ .5\omega_{24}(((1-r)x_1^{t-1}) + (r\frac{w}{v+w}x_1^{t-1})) & \text{if } j = 8; \\ 0 & \text{if } j = 9; \\ 0 & \text{if } j = 10; \\ 0 & \text{if } j = 11; \\ 0 & \text{if } j = 12; \\ .5\omega_{24}r\frac{v}{v+w}x_4^{t-1} & \text{if } j = 13; \\ .5\omega_{24}r\frac{v}{v+w}x_2^{t-1} & \text{if } j = 14; \\ .5\omega_{24}r\frac{v}{v+w}x_3^{t-1} & \text{if } j = 15; \\ .5\omega_{24}r\frac{v}{v+w}x_1^{t-1} & \text{if } j = 16 \\ 1 - \sum_j^{16} \mathbf{P}_{5,j}^{t,t-1} & \text{if } j = 17 \end{cases} \quad (14)$$



$$\mathbf{P}_{v,6,j}^{t,t-1} = \begin{cases} 0 & \text{if } j = 1; \\ 0 & \text{if } j = 2; \\ 0 & \text{if } j = 3; \\ 0 & \text{if } j = 4; \\ .5\omega_{22}(((1-r)x_4^{t-1}) + (rx_4^{t-1})) & \text{if } j = 5; \\ .5\omega_{22}(((1-r)x_2^{t-1}) + (rx_2^{t-1})) & \text{if } j = 6; \\ .5\omega_{22}(((1-r)x_3^{t-1}) + (rx_3^{t-1})) & \text{if } j = 7; \\ .5\omega_{22}(((1-r)x_1^{t-1}) + (rx_1^{t-1})) & \text{if } j = 8; \\ 0 & \text{if } j = 9; \\ 0 & \text{if } j = 10; \\ 0 & \text{if } j = 11; \\ 0 & \text{if } j = 12; \\ 0 & \text{if } j = 13; \\ 0 & \text{if } j = 14; \\ 0 & \text{if } j = 15; \\ 0 & \text{if } j = 16 \\ 1 - \sum_j^{16} \mathbf{P}_{6,j}^{t,t-1} & \text{if } j = 17 \end{cases} \quad (15)$$

$$\mathbf{P}_{v,7,j}^{t,t-1} = \begin{cases} .5\omega_{23}r\frac{w}{v+w}x_4^{t-1} & \text{if } j = 1; \\ .5\omega_{23}r\frac{w}{v+w}x_2^{t-1} & \text{if } j = 2; \\ .5\omega_{23}r\frac{w}{v+w}x_3^{t-1} & \text{if } j = 3; \\ .5\omega_{23}r\frac{w}{v+w}x_1^{t-1} & \text{if } j = 4; \\ .5\omega_{23}(1-r)x_4^{t-1} & \text{if } j = 5; \\ .5\omega_{23}(1-r)x_2^{t-1} & \text{if } j = 6; \\ .5\omega_{23}(1-r)x_3^{t-1} & \text{if } j = 7; \\ .5\omega_{23}(1-r)x_1^{t-1} & \text{if } j = 8; \\ 0 & \text{if } j = 9; \\ 0 & \text{if } j = 10; \\ 0 & \text{if } j = 11; \\ 0 & \text{if } j = 12; \\ .5\omega_{23}r\frac{v}{v+w}x_4^{t-1} & \text{if } j = 13; \\ .5\omega_{23}r\frac{v}{v+w}x_2^{t-1} & \text{if } j = 14; \\ .5\omega_{23}r\frac{v}{v+w}x_3^{t-1} & \text{if } j = 15; \\ .5\omega_{23}r\frac{v}{v+w}x_1^{t-1} & \text{if } j = 16 \\ 1 - \sum_j^{16} \mathbf{P}_{7,j}^{t,t-1} & \text{if } j = 17 \end{cases} \quad (16)$$

$$\mathbf{P}_{v,8,j}^{t,t-1} = \begin{cases} .5\omega_{12}r\frac{w}{v+w}x_4^{t-1} & \text{if } j = 1; \\ .5\omega_{12}r\frac{w}{v+w}x_2^{t-1} & \text{if } j = 2; \\ .5\omega_{12}r\frac{w}{v+w}x_3^{t-1} & \text{if } j = 3; \\ .5\omega_{12}r\frac{w}{v+w}x_1^{t-1} & \text{if } j = 4; \\ .5\omega_{12}(((1-r)x_4^{t-1}) + (r\frac{v}{v+w}x_4^{t-1})) & \text{if } j = 5; \\ .5\omega_{12}(((1-r)x_2^{t-1}) + (r\frac{v}{v+w}x_2^{t-1})) & \text{if } j = 6; \\ .5\omega_{12}(((1-r)x_3^{t-1}) + (r\frac{v}{v+w}x_3^{t-1})) & \text{if } j = 7; \\ .5\omega_{12}(((1-r)x_1^{t-1}) + (r\frac{v}{v+w}x_1^{t-1})) & \text{if } j = 8; \\ 0 & \text{if } j = 9; \\ 0 & \text{if } j = 10; \\ 0 & \text{if } j = 11; \\ 0 & \text{if } j = 12; \\ 0 & \text{if } j = 13; \\ 0 & \text{if } j = 14; \\ 0 & \text{if } j = 15; \\ 0 & \text{if } j = 16 \\ 1 - \sum_j^{16} \mathbf{P}_{8,j}^{t,t-1} & \text{if } j = 17 \end{cases} \quad (17)$$

$$\mathbf{P}_{v,9,j}^{t,t-1} = \begin{cases} 0 & \text{if } j = 1; \\ 0 & \text{if } j = 2; \\ 0 & \text{if } j = 3; \\ 0 & \text{if } j = 4; \\ 0 & \text{if } j = 5; \\ 0 & \text{if } j = 6; \\ 0 & \text{if } j = 7; \\ 0 & \text{if } j = 8; \\ .5\omega_{34}(((1-r)x_4^{t-1}) + (r\frac{v}{v+w}x_4^{t-1})) & \text{if } j = 9; \\ .5\omega_{34}(((1-r)x_2^{t-1}) + (r\frac{v}{v+w}x_2^{t-1})) & \text{if } j = 10; \\ .5\omega_{34}(((1-r)x_3^{t-1}) + (r\frac{v}{v+w}x_3^{t-1})) & \text{if } j = 11; \\ .5\omega_{34}(((1-r)x_1^{t-1}) + (r\frac{v}{v+w}x_1^{t-1})) & \text{if } j = 12; \\ .5\omega_{34}r\frac{w}{v+w}x_4^{t-1} & \text{if } j = 13; \\ .5\omega_{34}r\frac{w}{v+w}x_2^{t-1} & \text{if } j = 14; \\ .5\omega_{34}r\frac{w}{v+w}x_3^{t-1} & \text{if } j = 15; \\ .5\omega_{34}r\frac{w}{v+w}x_1^{t-1} & \text{if } j = 16 \\ 1 - \sum_j^{16} \mathbf{P}_{9,j}^{t,t-1} & \text{if } j = 17 \end{cases} \quad (18)$$

$$\mathbf{P}_{v,10,j}^{t,t-1} = \begin{cases} .5\omega_{23}r\frac{v}{v+w}x_4^{t-1} & \text{if } j = 1; \\ .5\omega_{23}r\frac{v}{v+w}x_2^{t-1} & \text{if } j = 2; \\ .5\omega_{23}r\frac{v}{v+w}x_3^{t-1} & \text{if } j = 3; \\ .5\omega_{23}r\frac{v}{v+w}x_1^{t-1} & \text{if } j = 4; \\ 0 & \text{if } j = 5; \\ 0 & \text{if } j = 6; \\ 0 & \text{if } j = 7; \\ 0 & \text{if } j = 8; \\ .5\omega_{23}(1-r)x_4^{t-1} & \text{if } j = 9; \\ .5\omega_{23}(1-r)x_2^{t-1} & \text{if } j = 10; \\ .5\omega_{23}(1-r)x_3^{t-1} & \text{if } j = 11; \\ .5\omega_{23}(1-r)x_1^{t-1} & \text{if } j = 12; \\ .5\omega_{23}r\frac{w}{v+w}x_4^{t-1} & \text{if } j = 13; \\ .5\omega_{23}r\frac{w}{v+w}x_2^{t-1} & \text{if } j = 14; \\ .5\omega_{23}r\frac{w}{v+w}x_3^{t-1} & \text{if } j = 15; \\ .5\omega_{23}r\frac{w}{v+w}x_1^{t-1} & \text{if } j = 16; \\ 1 - \sum_j^{16} \mathbf{P}_{10,j}^{t,t-1} & \text{if } j = 17 \end{cases} \quad (19)$$

$$\mathbf{P}_{v,11,j}^{t,t-1} = \begin{cases} 0 & \text{if } j = 1; \\ 0 & \text{if } j = 2; \\ 0 & \text{if } j = 3; \\ 0 & \text{if } j = 4; \\ 0 & \text{if } j = 5; \\ 0 & \text{if } j = 6; \\ 0 & \text{if } j = 7; \\ 0 & \text{if } j = 8; \\ .5\omega_{33}(((1-r)x_4^{t-1}) + (rx_4^{t-1})) & \text{if } j = 9; \\ .5\omega_{33}(((1-r)x_2^{t-1}) + (rx_2^{t-1})) & \text{if } j = 10; \\ .5\omega_{33}(((1-r)x_3^{t-1}) + (rx_3^{t-1})) & \text{if } j = 11; \\ .5\omega_{33}(((1-r)x_1^{t-1}) + (rx_1^{t-1})) & \text{if } j = 12; \\ 0 & \text{if } j = 13; \\ 0 & \text{if } j = 14; \\ 0 & \text{if } j = 15; \\ 0 & \text{if } j = 16; \\ 1 - \sum_j^{16} \mathbf{P}_{11,j}^{t,t-1} & \text{if } j = 17 \end{cases} \quad (20)$$

$$\mathbf{P}_{v,12,j}^{t,t-1} = \begin{cases} .5\omega_{13}r\frac{v}{v+w}x_4^{t-1} & \text{if } j = 1; \\ .5\omega_{13}r\frac{v}{v+w}x_2^{t-1} & \text{if } j = 2; \\ .5\omega_{13}r\frac{v}{v+w}x_3^{t-1} & \text{if } j = 3; \\ .5\omega_{13}r\frac{v}{v+w}x_1^{t-1} & \text{if } j = 4 \\ 0 & \text{if } j = 5; \\ 0 & \text{if } j = 6; \\ 0 & \text{if } j = 7; \\ 0 & \text{if } j = 8; \\ .5\omega_{13}(((1-r)x_4^{t-1}) + (r\frac{w}{v+w}x_4^{t-1})) & \text{if } j = 9; \\ .5\omega_{13}(((1-r)x_2^{t-1}) + (r\frac{w}{v+w}x_2^{t-1})) & \text{if } j = 10; \\ .5\omega_{13}(((1-r)x_3^{t-1}) + (r\frac{w}{v+w}x_3^{t-1})) & \text{if } j = 11; \\ .5\omega_{13}(((1-r)x_1^{t-1}) + (r\frac{w}{v+w}x_1^{t-1})) & \text{if } j = 12; \\ 0 & \text{if } j = 13; \\ 0 & \text{if } j = 14; \\ 0 & \text{if } j = 15; \\ 0 & \text{if } j = 16 \\ 1 - \sum_j^{16} \mathbf{P}_{12,j}^{t,t-1} & \text{if } j = 17 \end{cases} \quad (21)$$

$$\mathbf{P}_{v,13,j}^{t,t-1} = \begin{cases} 0 & \text{if } j = 1; \\ 0 & \text{if } j = 2; \\ 0 & \text{if } j = 3; \\ 0 & \text{if } j = 4; \\ 0 & \text{if } j = 5; \\ 0 & \text{if } j = 6; \\ 0 & \text{if } j = 7; \\ 0 & \text{if } j = 8; \\ 0 & \text{if } j = 9; \\ 0 & \text{if } j = 10; \\ 0 & \text{if } j = 11; \\ 0 & \text{if } j = 12; \\ .5\omega_{44}(((1-r)x_4^{t-1}) + (rx_4^{t-1})) & \text{if } j = 13; \\ .5\omega_{44}(((1-r)x_2^{t-1}) + (rx_2^{t-1})) & \text{if } j = 14; \\ .5\omega_{44}(((1-r)x_3^{t-1}) + (rx_3^{t-1})) & \text{if } j = 15; \\ .5\omega_{44}(((1-r)x_1^{t-1}) + (rx_1^{t-1})) & \text{if } j = 16; \\ 1 - \sum_j^{16} \mathbf{P}_{13,j}^{t,t-1} & \text{if } j = 17 \end{cases} \quad (22)$$

$$\mathbf{P}_{v,14,j}^{t,t-1} = \begin{cases} 0 & \text{if } j = 1; \\ 0 & \text{if } j = 2; \\ 0 & \text{if } j = 3; \\ 0 & \text{if } j = 4; \\ .5\omega_{24}r\frac{v}{v+w}x_4^{t-1} & \text{if } j = 5; \\ .5\omega_{24}r\frac{v}{v+w}x_2^{t-1} & \text{if } j = 6; \\ .5\omega_{24}r\frac{v}{v+w}x_3^{t-1} & \text{if } j = 7; \\ .5\omega_{24}r\frac{v}{v+w}x_1^{t-1} & \text{if } j = 8; \\ 0 & \text{if } j = 9; \\ 0 & \text{if } j = 10; \\ 0 & \text{if } j = 11; \\ 0 & \text{if } j = 12; \\ .5\omega_{24}(((1-r)x_4^{t-1}) + (r\frac{w}{v+w}x_4^{t-1})) & \text{if } j = 13; \\ .5\omega_{24}(((1-r)x_2^{t-1}) + (r\frac{w}{v+w}x_2^{t-1})) & \text{if } j = 14; \\ .5\omega_{24}(((1-r)x_3^{t-1}) + (r\frac{w}{v+w}x_3^{t-1})) & \text{if } j = 15; \\ .5\omega_{24}(((1-r)x_1^{t-1}) + (r\frac{w}{v+w}x_1^{t-1})) & \text{if } j = 16; \\ 1 - \sum_j^{16} \mathbf{P}_{14,j}^{t,t-1} & \text{if } j = 17 \end{cases} \quad (23)$$

$$\mathbf{P}_{v,15,j}^{t,t-1} = \begin{cases} 0 & \text{if } j = 1; \\ 0 & \text{if } j = 2; \\ 0 & \text{if } j = 3; \\ 0 & \text{if } j = 4; \\ 0 & \text{if } j = 5; \\ 0 & \text{if } j = 6; \\ 0 & \text{if } j = 7; \\ 0 & \text{if } j = 8; \\ .5\omega_{34}r\frac{w}{v+w}x_4^{t-1} & \text{if } j = 9; \\ .5\omega_{34}r\frac{w}{v+w}x_2^{t-1} & \text{if } j = 10; \\ .5\omega_{34}r\frac{w}{v+w}x_3^{t-1} & \text{if } j = 11; \\ .5\omega_{34}r\frac{w}{v+w}x_1^{t-1} & \text{if } j = 12; \\ .5\omega_{34}(((1-r)x_4^{t-1}) + (r\frac{v}{v+w}x_4^{t-1})) & \text{if } j = 13; \\ .5\omega_{34}(((1-r)x_2^{t-1}) + (r\frac{v}{v+w}x_2^{t-1})) & \text{if } j = 14; \\ .5\omega_{34}(((1-r)x_3^{t-1}) + (r\frac{v}{v+w}x_3^{t-1})) & \text{if } j = 15; \\ .5\omega_{34}(((1-r)x_1^{t-1}) + (r\frac{v}{v+w}x_1^{t-1})) & \text{if } j = 16; \\ 1 - \sum_j^{16} \mathbf{P}_{15,j}^{t,t-1} & \text{if } j = 17 \end{cases} \quad (24)$$

$$\mathbf{P}_{v,16,j}^{t,t-1} = \begin{cases} 0 & \text{if } j = 1; \\ 0 & \text{if } j = 2; \\ 0 & \text{if } j = 3; \\ 0 & \text{if } j = 4; \\ .5\omega_{44}r \frac{v}{v+w} x_4^{t-1} & \text{if } j = 9; \\ .5\omega_{44}r \frac{v}{v+w} x_2^{t-1} & \text{if } j = 10; \\ .5\omega_{44}r \frac{v}{v+w} x_3^{t-1} & \text{if } j = 11; \\ .5\omega_{44}r \frac{v}{v+w} x_1^{t-1} & \text{if } j = 12 \\ .5\omega_{44}r \frac{w}{v+w} x_4^{t-1} & \text{if } j = 9; \\ .5\omega_{44}r \frac{w}{v+w} x_2^{t-1} & \text{if } j = 10; \\ .5\omega_{44}r \frac{w}{v+w} x_3^{t-1} & \text{if } j = 11; \\ .5\omega_{44}r \frac{w}{v+w} x_1^{t-1} & \text{if } j = 12 \\ .5\omega_{44}(1-r)x_4^{t-1} & \text{if } j = 13; \\ .5\omega_{44}(1-r)x_2^{t-1} & \text{if } j = 14; \\ .5\omega_{44}(1-r)x_3^{t-1} & \text{if } j = 15; \\ .5\omega_{44}(1-r)x_1^{t-1} & \text{if } j = 16; \\ 1 - \sum_j^{16} \mathbf{P}_{16,j}^{t,t-1} & \text{if } j = 17 \end{cases} \quad (25)$$

$$\mathbf{P}_{v,17,j}^{t,t-1} = \begin{cases} 0 & \text{if } j = 1; \\ 0 & \text{if } j = 2; \\ 0 & \text{if } j = 3; \\ 0 & \text{if } j = 4; \\ 0 & \text{if } j = 5; \\ 0 & \text{if } j = 6; \\ 0 & \text{if } j = 7; \\ 0 & \text{if } j = 8; \\ 0 & \text{if } j = 9; \\ 0 & \text{if } j = 10; \\ 0 & \text{if } j = 11; \\ 0 & \text{if } j = 12; \\ 0 & \text{if } j = 13; \\ 0 & \text{if } j = 14; \\ 0 & \text{if } j = 15; \\ 0 & \text{if } j = 16; \\ 1 & \text{if } j = 17 \end{cases} \quad (26)$$

## 268 References

- 269 Aleksandr Andreychenko. *Uniformization for time-inhomogeneous Markov population models*. PhD  
270 thesis, Saarland University, 2010.
- 271 NH Barton. The dynamics of hybrid zones. *Heredity*, 43(3):341, 1979.
- 272 Nicholas H Barton and Godfrey M Hewitt. Analysis of hybrid zones. *Annual Review of Ecology and*  
273 *systematics*, 16(1):113–148, 1985.
- 274 Jeffrey Chan, Valerio Perrone, Jeffrey P Spence, Paul A Jenkins, Sara Mathieson, and  
275 Yun S Song. A likelihood-free inference framework for population genetic data us-  
276 ing exchangeable neural networks. *bioRxiv*, 2018. doi: 10.1101/267211. URL  
277 <https://www.biorxiv.org/content/early/2018/02/18/267211>.
- 278 Theodosius Dobzhansky. *Genetics and the Origin of Species*. Columbia University Press, 1937.
- 279 John A Endler. Gene flow and population differentiation: studies of clines suggest that differentiation  
280 along environmental gradients may be independent of gene flow. *Science*, 179(4070):243–250, 1973.
- 281 Sergey Gavrilets. Hybrid zones with dobzhansky-type epistatic selection. *Evolution*, 51(4):1027–1035,  
282 1997.
- 283 Zachariah Gompert and C Alex Buerkle. Analyses of genetic ancestry enable key insights for molecular  
284 ecology. *Molecular Ecology*, 22(21):5278–5294, 2013.
- 285 Zachariah Gompert, Thomas L Parchman, and C Alex Buerkle. Genomics of isolation in hybrids.  
286 *Philosophical Transactions of the Royal Society of London B: Biological Sciences*, 367(1587):439–  
287 450, 2012.
- 288 Simon Gravel. Population genetics models of local ancestry. *Genetics*, 191(2):607–619, 2012.
- 289 Kelley Harris and Rasmus Nielsen. Inferring demographic history from a spectrum of shared haplotype  
290 lengths. *PLoS Genetics*, 9(6):e1003521, 2013.
- 291 Richard G Harrison and Erica L Larson. Heterogeneous genome divergence, differential introgression,  
292 and the origin and structure of hybrid zones. *Molecular Ecology*, 25(11):2454–2466, 2016.
- 293 Garrett Hellenthal, George BJ Busby, Gavin Band, James F Wilson, Cristian Capelli, Daniel Falush,  
294 and Simon Myers. A genetic atlas of human admixture history. *Science*, 343(6172):747–751, 2014.

- 295 John A Hvala, Megan E Frayer, and Bret A Payseur. Signatures of hybridization and speciation in  
296 genomic patterns of ancestry. *Evolution*, 2018.
- 297 Mason Liang and Rasmus Nielsen. The lengths of admixture tracts. *Genetics*, 197(3):953–967, 2014.
- 298 Dorothea Lindtke and C Alex Buerkle. The genetic architecture of hybrid incompatibilities and their  
299 effect on barriers to introgression in secondary contact. *Evolution*, 69(8):1987–2004, 2015.
- 300 Po-Ru Loh, Mark Lipson, Nick Patterson, Priya Moorjani, Joseph K Pickrell, David Reich, and Bonnie  
301 Berger. Inferring admixture histories of human populations using linkage disequilibrium. *Genetics*,  
302 193(4):1233–1254, 2013.
- 303 Shamoni Maheshwari and Daniel A Barbash. The genetics of hybrid incompatibilities. *Annual Review*  
304 *of Genetics*, 45:331–355, 2011.
- 305 Nick Patterson, Priya Moorjani, Yontao Luo, Swapan Mallick, Nadin Rohland, Yiping Zhan, Teri  
306 Genschoreck, Teresa Webster, and David Reich. Ancient admixture in human history. *Genetics*,  
307 192(3):1065–1093, 2012.
- 308 Bret A Payseur. Using differential introgression in hybrid zones to identify genomic regions involved  
309 in speciation. *Molecular Ecology Resources*, 10(5):806–820, 2010.
- 310 Bret A Payseur and Loren H Rieseberg. A genomic perspective on hybridization and speciation.  
311 *Molecular Ecology*, 25(11):2337–2360, 2016.
- 312 John E Pool and Rasmus Nielsen. Inference of historical changes in migration rate from the lengths  
313 of migrant tracts. *Genetics*, 181(2):711–719, 2009.
- 314 Daven C Presgraves. The molecular evolutionary basis of species formation. *Nature Reviews Genetics*,  
315 11(3):175, 2010.
- 316 Alkes L Price, Arti Tandon, Nick Patterson, Kathleen C Barnes, Nicholas Rafaels, Ingo Ruczinski,  
317 Terri H Beaty, Rasika Mathias, David Reich, and Simon Myers. Sensitive detection of chromosomal  
318 segments of distinct ancestry in admixed populations. *PLoS Genetics*, 5(6):e1000519, 2009.
- 319 Douglas W Schemske. Understanding the origin of species. *Evolution*, 54(3):1069–1073, 2000.
- 320 Douglas W Schemske and HD Bradshaw. Pollinator preference and the evolution of floral traits in  
321 monkeyflowers (*Mimulus*). *Proceedings of the National Academy of Sciences*, 96(21):11910–11915,  
322 1999.



- 323 Dolph Schluter. Evidence for ecological speciation and its alternative. *Science*, 323(5915):737–741,  
324 2009.
- 325 Daniel R Schrider and Andrew D Kern. Supervised machine learning for population genetics: A new  
326 paradigm. *Trends in Genetics*, 2018.
- 327 Molly Schumer and Yaniv Brandvain. Determining epistatic selection in admixed populations. *Molec-*  
328 *ular Ecology*, 25(11):2577–2591, 2016.
- 329 Molly Schumer, Rongfeng Cui, Daniel L Powell, Rebecca Dresner, Gil G Rosenthal, and Peter An-  
330 dolfatto. High-resolution mapping reveals hundreds of genetic incompatibilities in hybridizing fish  
331 species. *Elife*, 3, 2014.
- 332 Alisa Sedghifar, Yaniv Brandvain, Peter Ralph, and Graham Coop. The spatial mixing of genomes in  
333 secondary contact zones. *Genetics*, 201(1):243–261, 2015.
- 334 Alisa Sedghifar, Yaniv Brandvain, and Peter Ralph. Beyond clines: lineages and haplotype blocks in  
335 hybrid zones. *Molecular Ecology*, 25(11):2559–2576, 2016.
- 336 Ole Seehausen, Roger K Butlin, Irene Keller, Catherine E Wagner, Janette W Boughman, Paul A Ho-  
337 henlohe, Catherine L Peichel, Glenn-Peter Saetre, Claudia Bank, Åke Brännström, et al. Genomics  
338 and the origin of species. *Nature Reviews Genetics*, 15(3):176, 2014.
- 339 Sara Sheehan and Yun S Song. Deep learning for population genetic inference. *PLoS Computational*  
340 *Biology*, 12(3):e1004845, 2016.
- 341 William J Stewart. *Introduction to the numerical solution of Markov chains*. Princeton University  
342 Press, 1994.
- 343 Andrea L Sweigart and John H Willis. Molecular evolution and genetics of postzygotic reproductive  
344 isolation in plants. *F1000 Biology Reports*, 4, 2012.
- 345 Peter Tiffin and Jeffrey Ross-Ibarra. Advances and limits of using population genetics to understand  
346 local adaptation. *Trends in Ecology & Evolution*, 29(12):673–680, 2014.
- 347 Michael Turelli, Jeremy R Lipkowitz, and Yaniv Brandvain. On the Coyne and Orr-igin of species:  
348 effects of intrinsic postzygotic isolation, ecological differentiation, X chromosome size, and sympatry  
349 on *Drosophila* speciation. *Evolution*, 68(4):1176–1187, 2014.

- 350 Michael A White, Brian Steffy, Tim Wiltshire, and Bret A Payseur. Genetic dissection of a key  
351 reproductive barrier between nascent species of house mice. *Genetics*, 189(1):289–304, 2011.
- 352 MJD White. Models of speciation. *Science*, 159(3819):1065–1070, 1968.
